# Supplementary material for: CD123 expression levels in 846 acute leukemia patients based on standardized immunophenotyping
Source: PubMed Central journal article supplement — Cytometry B Clin Cytom. 2018 Nov 18;96(2):134–42. doi: 10.1002/cyto.b.21745 (PMC6587863; doi:10.1002/cyto.b.21745), 2018-11-18

# EXTENDED SUPPLEMENT

## 1. Analysis based on MEAN instead of MEDIAN values

Statistical analysis based on CD123 median fluorescence intensity values was repeated based on CD123 mean fluorescence intensity values, resulting in similar conclusions. In addition, figures visualizing median values were re-generated based on mean values.

Figure 1 from main article - Based on mean (instead of median)

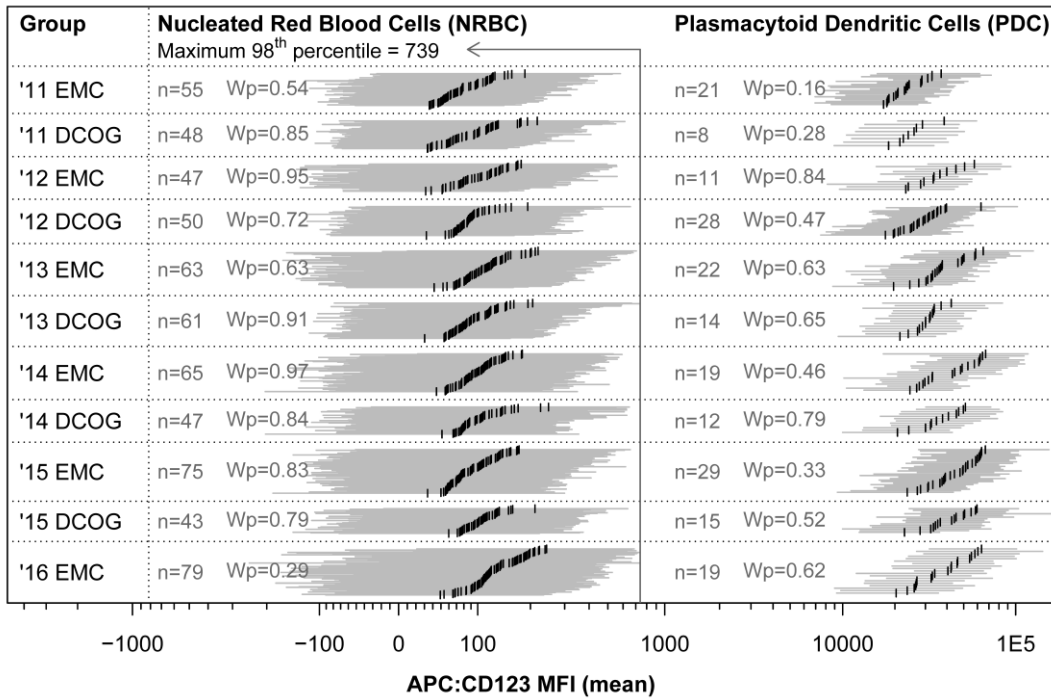

Figure 2 from main article - Based on mean (instead of median)

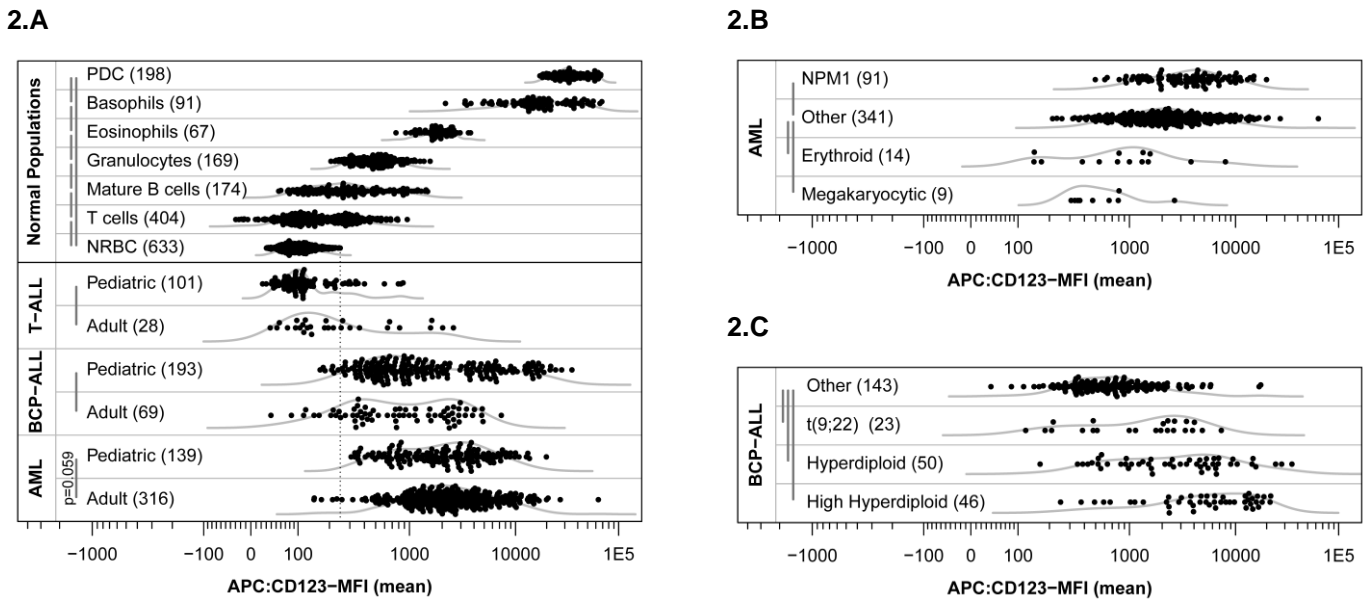

Figure 4 from main article - Based on mean (instead of median)

A.A

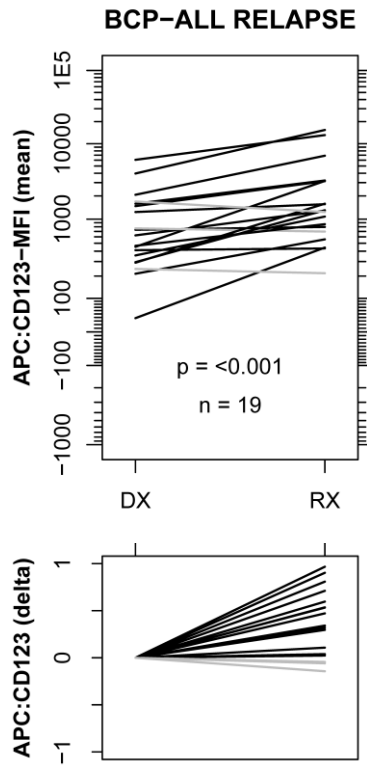

4.B

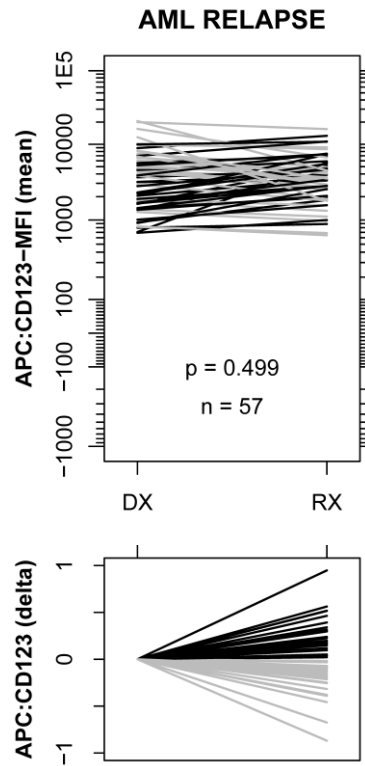

4.C

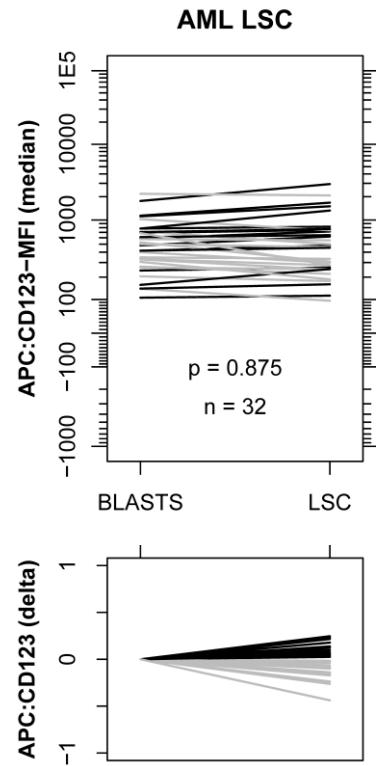

Figures from supplement 6 - Based on mean (instead of median)

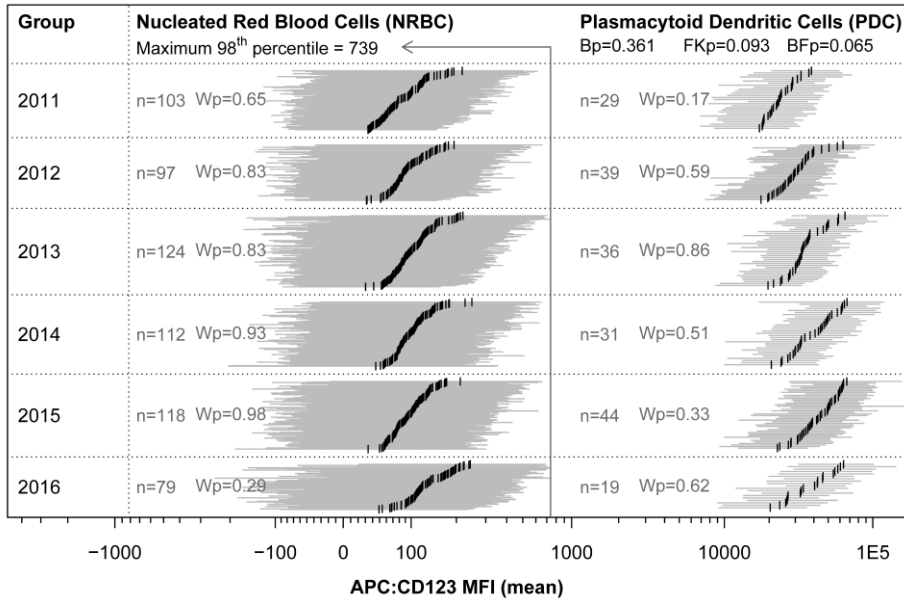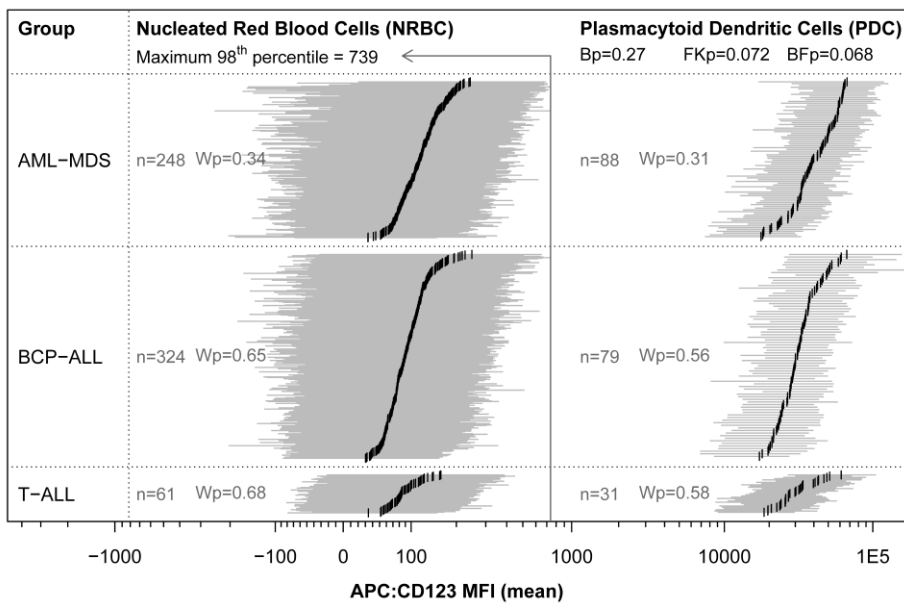

Figures from supplement 8 - Based on mean (instead of median)

### Precursors

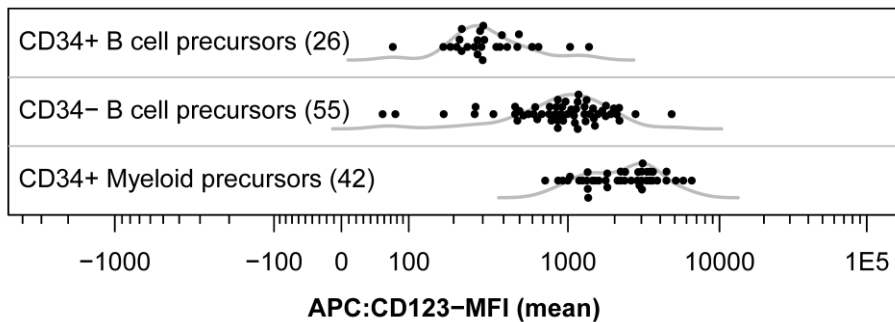

Figures from supplement 9 - Based on mean (instead of median)

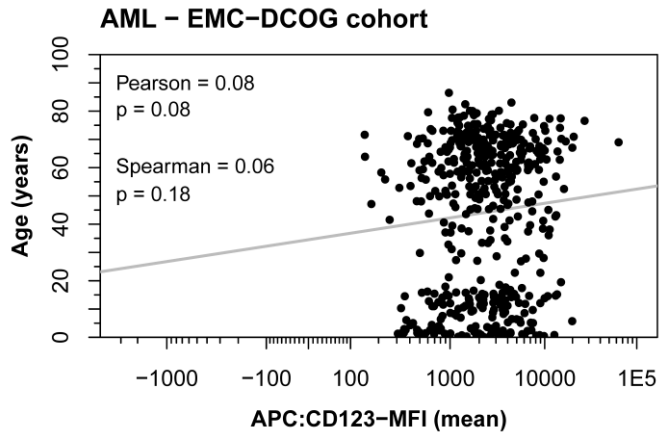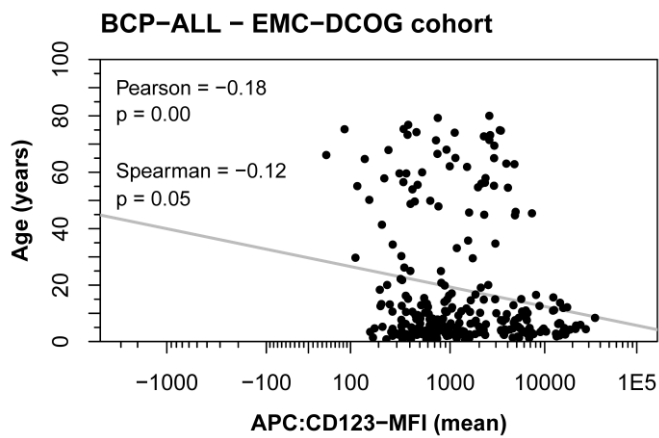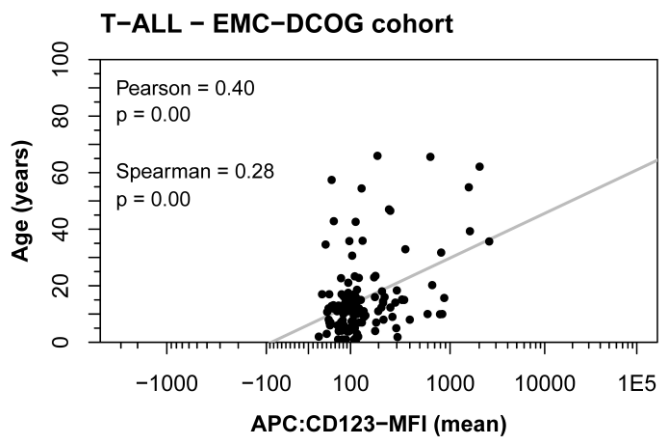

Figures from supplement 10 - Based on mean (instead of median)

**AML SUBGROUPS**

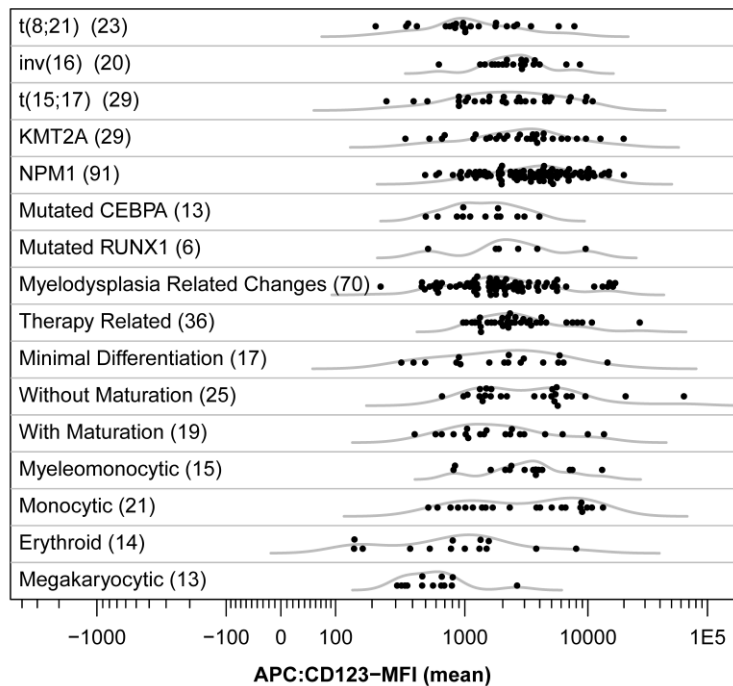

**AML SUBGROUPS - FLT3-ITD**

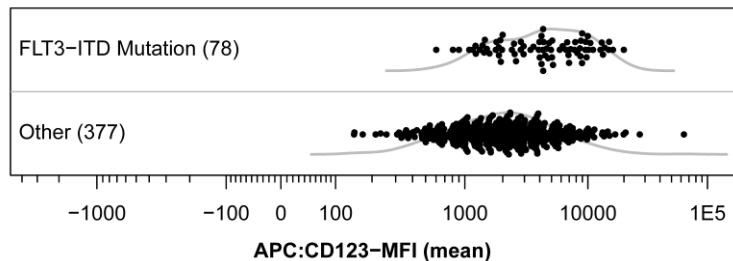

**BCP-ALL SUBGROUPS**

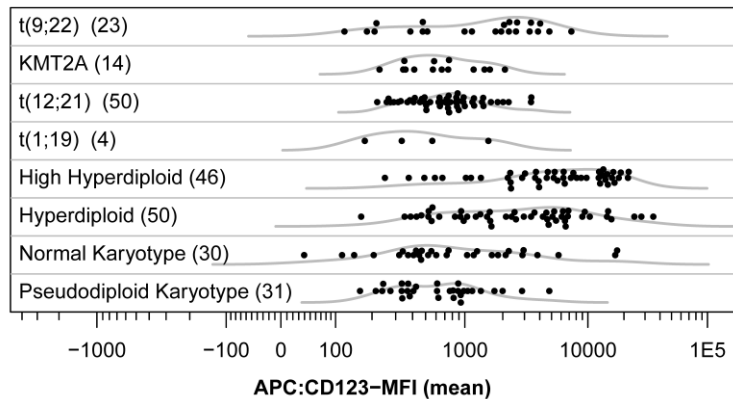

## 2. Analysis based on 1000 instead of 739 as CD123 positivity cut-off

CD123-PPC values, as used during statistical analysis, were based on the 739 intensity cut-off. Statistical analysis based on the 1000 intensity cut-off resulted in similar conclusions. In addition, figures based on the 739 intensity cut-off were re-generated based on the 1000 intensity cut-off.

Figure 3 from main article - Based on 1000 intensity cut-off (instead 739 intensity cut-off)

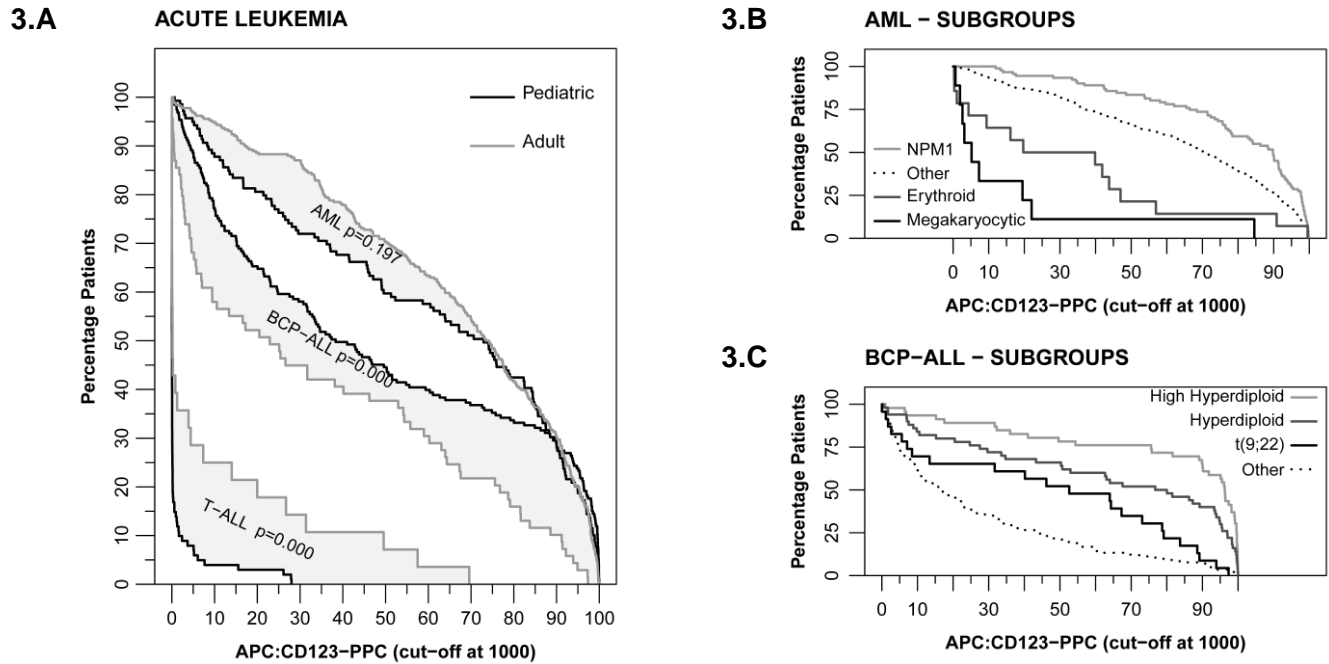

Figure from supplement 11 - Based on 1000 intensity cut-off (instead 739 intensity cut-off)

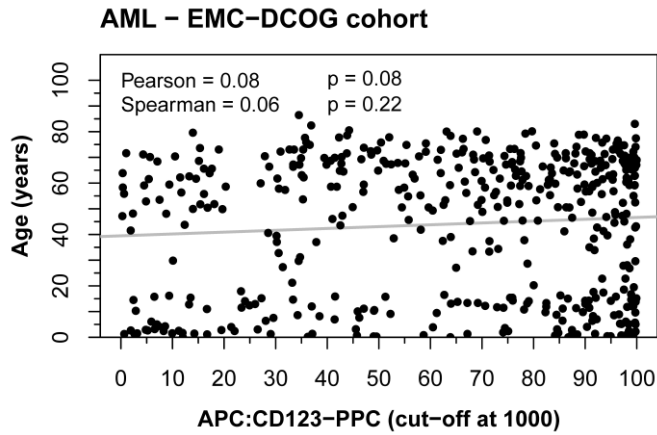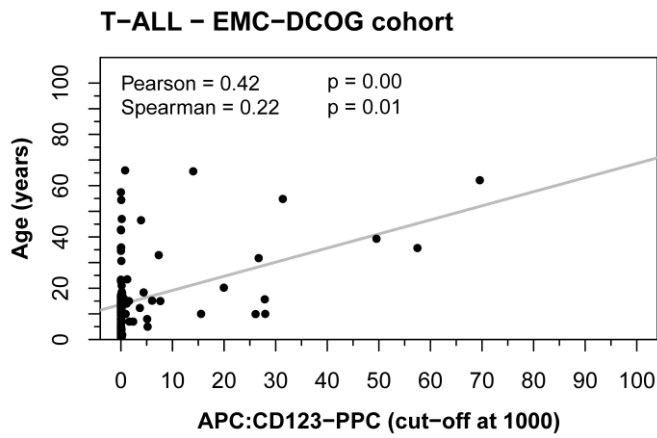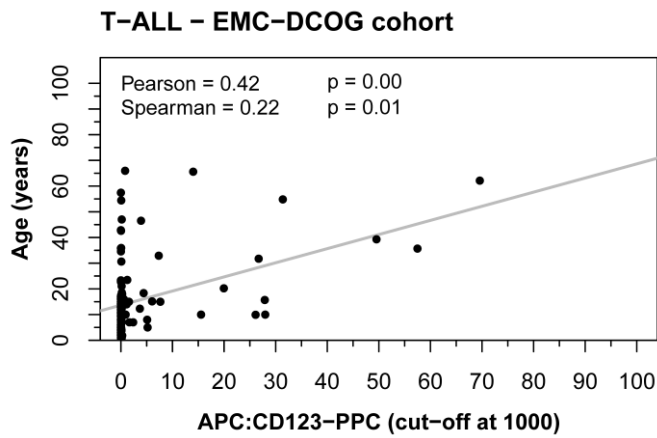



Figure from supplement 12 - Based on 1000 intensity cut-off (instead 739 intensity cut-off)

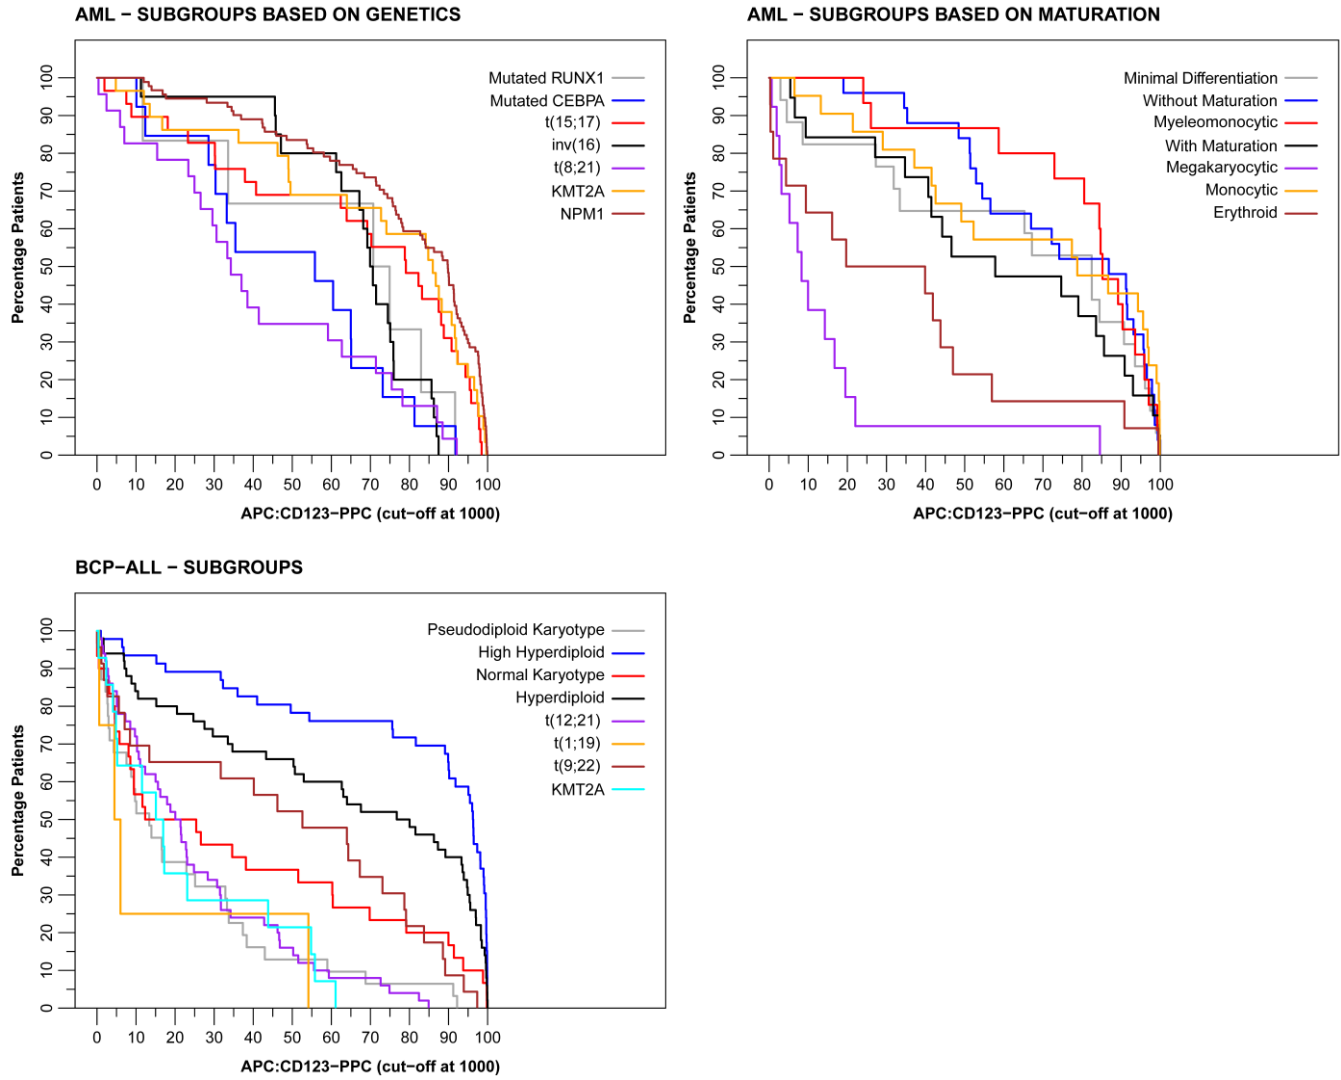

### 3. CD123-MFI versus age in EMC cohort

Combining the EMC and DCOG cohort resulted in a skewed age distribution for AML and T-ALL patients since the DCOG cohort only contains pediatric patients and the EMC cohort contains pediatric and adult patients. Therefore age-related statistical analysis was repeated within the EMC cohort, in order to make sure that our conclusions were not impacted by the skewed age distribution within the combined EMC and DCOG cohort.

Figures - EMC cohort (age, continuous)

Figures - EMC cohort (age, pediatric versus adult)

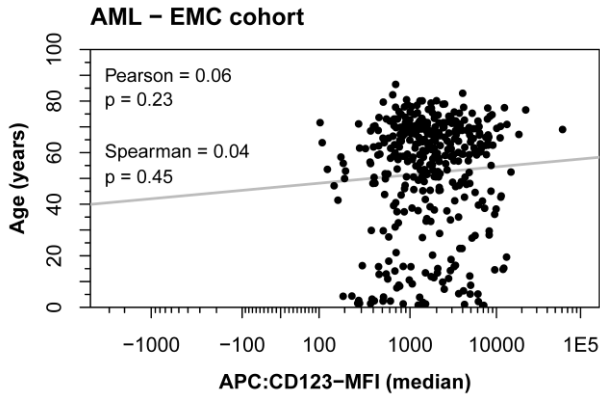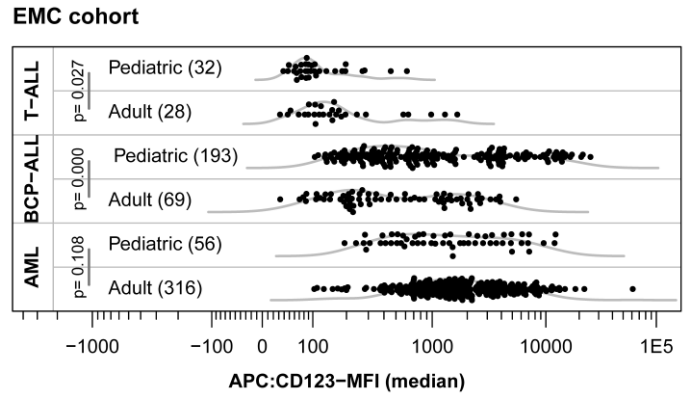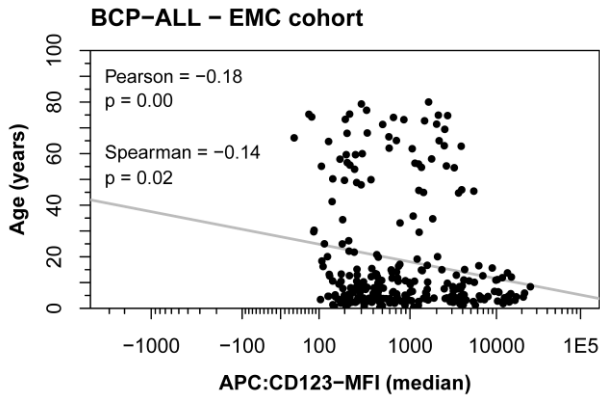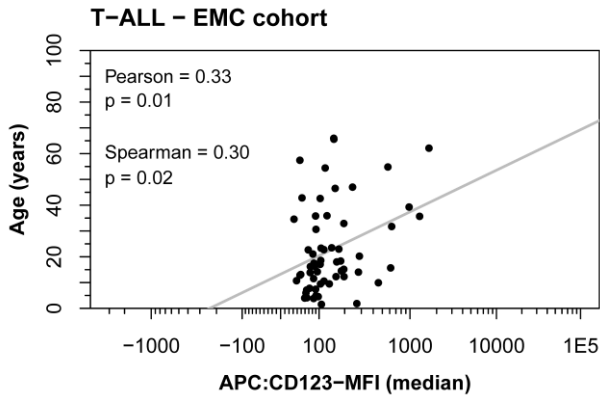

## 4. CD123-PPC versus age in EMC cohort

Combining the EMC and DCOG cohort resulted in a skewed age distribution for AML and T-ALL patients since the DCOG cohort only contains pediatric patients and the EMC cohort contains pediatric and adult patients. Therefore age-related statistical analysis was repeated within the EMC cohort, in order to make sure that our conclusions were not impacted by the skewed age distribution within the combined EMC and DCOG cohort. Following figures visualize CD123-PPC based on the 739 intensity cut-off (as used within the main article).

Figures - EMC cohort (age, continuous)

Figures - EMC cohort (age, pediatric versus adult)

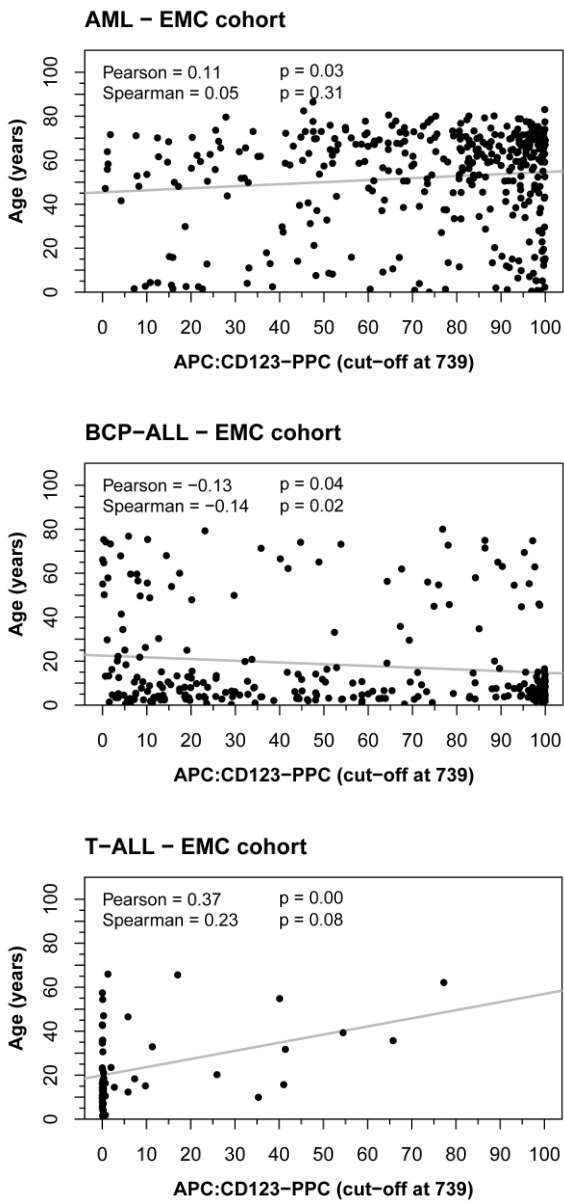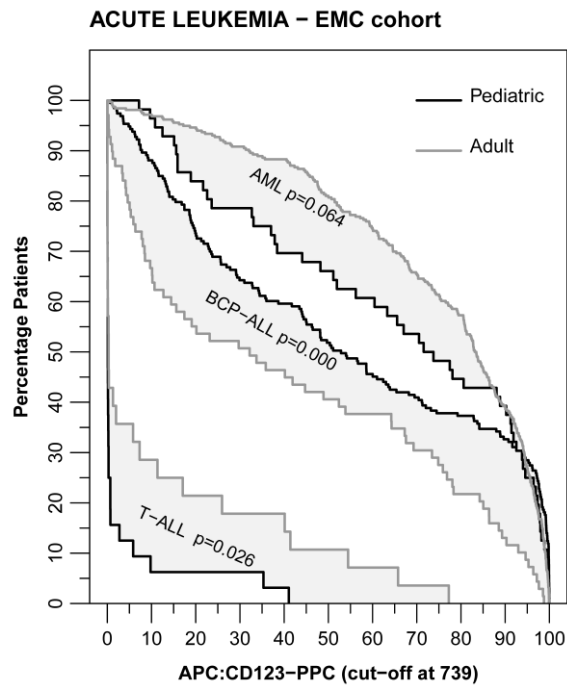

Supplement: CYTO-96-134-s004.pdf [file CYTO-96-134-s004.pdf]
